# Supplementary material
Source: HighWire-hosted journal article supplement (https://jnm.snmjournals.org/highwire/filestream/94656/field_highwire_adjunct_files/0/148734_Supplemental_Data.pdf)
Supplement: 148734_Supplemental_Data.pdf [file 148734_Supplemental_Data.pdf]

**Supplemental Table 1:** Clinical and imaging characteristics of patients with newly diagnosed cerebral lesions

| Patient ID      | Diagnosis                                | WHO grade        | Confirmation of diagnosis     | Presence of tumor | CE on MRI | TBR <sub>max</sub> | TBR <sub>mean</sub> | TTP (min)     | Kinetic pattern |
|-----------------|------------------------------------------|------------------|-------------------------------|-------------------|-----------|--------------------|---------------------|---------------|-----------------|
| 1 <sup>+</sup>  | A                                        | II               | B                             | Yes               | Yes       | 1.7                | 1.2                 | 40            | 1               |
| 2               | Hyperintense MRI lesion (supratentorial) | n.a.             | Clinically and follow-up MRI* | No                | No        | 1.5                | 1.2                 | 45            | 1               |
| 3               | AA                                       | III              | B                             | Yes               | No        | 3.8                | 2.3                 | 25            | 2               |
| 4               | A                                        | II               | B                             | Yes               | Yes       | 3.5                | 2.4                 | 25            | 2               |
| 6               | DNT                                      | I                | R                             | Yes               | Yes       | 2.4                | 1.9                 | 20            | 2               |
| 7               | Multiple Sclerosis                       | n.a.             | B                             | No                | Yes       | 1.9                | 1.7                 | 45            | 1               |
| 8               | Hyperintense MRI lesion (pons)           | n.a.             | Follow-up**                   | Yes               | No        | 1.0                | 0.9                 | 13            | 3               |
| 9               | Stroke                                   | n.a.             | Clinically and follow-up MRI  | No                | Yes       | 1.7                | 1.5                 | 40            | 1               |
| 10              | AA                                       | III              | B                             | Yes               | No        | 1.7                | 1.6                 | 8             | 3               |
| 11              | A                                        | I                | B                             | Yes               | n.a.      | 2.4                | 1.7                 | 45            | 1               |
| 12              | LGG                                      | not classifiable | B                             | Yes               | No        | 1.3                | 1.0                 | 45            | 1               |
| 13 <sup>+</sup> | A                                        | II               | B                             | Yes               | No        | 1.7                | 1.5                 | 20            | 2               |
| 14              | LGG                                      | not classifiable | B                             | Yes               | No        | 1.7                | 1.5                 | 45            | 1               |
| 16 <sup>+</sup> | GBM                                      | IV               | R                             | Yes               | n.a.      | 4.6                | 2.6                 | 20            | 3               |
| 18              | AA                                       | III              | B                             | Yes               | No        | 1.2                | 1.0                 | 8             | 3               |
| 19 <sup>+</sup> | GBM                                      | IV               | B                             | Yes               | n.a.      | 3.0                | 2.0                 | 25            | 2               |
| 21              | AVM                                      | n.a.             | MR imaging findings           | No                | No        | 1.5                | 1.2                 | 20            | 2               |
| 22              | GBM                                      | IV               | R                             | Yes               | Yes       | 3.1                | 1.9                 | 45            | 1               |
| 27              | Hyperintense MRI lesion (supratentorial) | n.a.             | Follow-up***                  | No                | No        | 1.0                | 0.8                 | 30            | 1               |
| 28 <sup>+</sup> | GBM                                      | IV               | R                             | Yes               | No        | 2.9                | 2.1                 | 20            | 2               |
| 34              | AA                                       | III              | B                             | Yes               | Yes       | 2.3                | 1.9                 | 25            | 2               |
| 38              | Hyperintense MRI lesion (supratentorial) | n.a.             | Follow-up****                 | No                | No        | 1.6                | 1.2                 | 17            | 2               |
| 43              | A                                        | II               | R                             | Yes               | No        | 2.1                | 1.8                 | 25            | 2               |
| 44              | A                                        | I                | R                             | Yes               | Yes       | 2.1                | 1.8                 | 40            | 1               |
| 47              | Rathke's cyst                            | n.a.             | B                             | No                | No        | 0.6                | 0.3                 | not evaluable | not evaluable   |
| 48              | LGG                                      | not classifiable | B                             | Yes               | No        | 1.2                | 0.9                 | not evaluable | not evaluable   |

**A:** astrocytoma; **AA:** anaplastic astrocytoma; **DNT:** dysembryoplastic neuroepithelial tumor; **LGG:** low-grade glioma; **GBM:** glioblastoma; **AVM:** arteriovenous malformation; **CE:** contrast enhancement; **B:** biopsy; **R:** resection; **TTP:** time-to-peak; **n.a.:** not available; \*lesion disappeared in the follow-up MRI after 3 months; \*\*patient died 9 months later; \*\*\*stable after 12 months without treatment; \*\*\*\*stable after 16 months without treatment; <sup>+</sup>patients were additionally examined for other indications

**Supplemental Table 2:** Clinical and imaging characteristics of patients with suspicion of tumor progression/recurrence

| Patient ID      | Initial Diagnosis | WHO Grade | Presence of PD | Confirmation of diagnosis (PD / no PD)  | Treatment of PD                         | Follow-up after <sup>18</sup> F-FET PET (months) | CE on MRI | TBR <sub>max</sub> | TBR <sub>mean</sub> | TTP (min) | Kinetic pattern |
|-----------------|-------------------|-----------|----------------|-----------------------------------------|-----------------------------------------|--------------------------------------------------|-----------|--------------------|---------------------|-----------|-----------------|
| 1 <sup>+</sup>  | AA*               | III       | Yes            | B and clinically, died 11 mo later      | symptomatic treatment                   | 11                                               | No        | 4.4                | 2.4                 | 30        | 2               |
| 5               | Ependymoma        | III       | Yes            | clinically                              | RTx                                     | 24                                               | Yes       | 2.8                | 1.9                 | 25        | 2               |
| 13 <sup>+</sup> | A                 | II        | Yes            | clinically, died 14 mo later            | symptomatic treatment                   | 14                                               | No        | 2.9                | 2.0                 | 10        | 3               |
| 15              | GBM               | IV        | Yes            | clinically, died 1 mo later             | palliative care                         | 1                                                | Yes       | 4.4                | 2.8                 | 13        | 3               |
| 16 <sup>+</sup> | GBM               | IV        | Yes            | clinically                              | Cilengitide, after 4 mo palliative care | 25                                               | Yes       | 2.6                | 2.0                 | 30        | 2               |
| 17              | GBM               | IV        | No             | clinically, stable follow-up over 22 mo | no treatment                            | 22                                               | No        | 1.3                | 1.0                 | 45        | 1               |
|                 |                   |           | No             |                                         |                                         |                                                  | 1.2       | 0.9                | 45                  | 1         |                 |
|                 |                   |           | No             |                                         |                                         |                                                  | 1.4       | 0.9                | 40                  | 1         |                 |
| 20              | GBM               | IV        | Yes            | B                                       | RTx, TMZ                                | 2                                                | n.a.      | 1.1                | 0.8                 | 45        | 1               |
|                 |                   |           | Yes            | clinically, died 18 mo later            | trofosfamide + etoposide                | 18                                               | Yes       | 1.8                | 1.7                 | 20        | 2               |
| 23              | A                 | II        | No             | B                                       | no treatment                            | 8                                                | No        | 1.1                | 0.9                 | 40        | 1               |
| 24              | A                 | I         | No             | clinically, stable follow-up over 12 mo | no treatment                            | 12                                               | Yes       | 0.7                | 0.6                 | 40        | 1               |
| 25              | A                 | I         | No             | clinically                              | no treatment                            | 3                                                | Yes       | 1.9                | 1.7                 | 40        | 1               |
|                 |                   |           | No             | clinically, stable follow-up for 12 mo  | no treatment                            | 12                                               | n.a.      | 2.1                | 1.8                 | 40        | 1               |
| 26              | GBM               | IV        | Yes            | clinically                              | Cilengitide                             | 8                                                | n.a.      | 3.8                | 2.4                 | 25        | 2               |
| 30              | Ependymoma        | II        | No             | clinically, stable follow-up for 14 mo  | no treatment                            | 14                                               | Yes       | 1.6                | 1.4                 | 40        | 1               |
| 32              | Ependymoma        | III       | No             | clinically, stable follow-up for 11 mo  | no treatment                            | 11                                               | Yes       | 1.0                | 1.0                 | n.a.      | n.a.            |
| 33 <sup>+</sup> | PXA               | II        | Yes            | R                                       | R                                       | n.a.                                             | Yes       | 1.7                | 1.7                 | 23        | 2               |
| 40              | MM metastasis     | n.a.      | Yes            | clinically, patient died 1 mo later     | palliative care                         | 1                                                | Yes       | 2.1                | 1.8                 | n.a.      | n.a.            |

|                 |                 |     |     |            |                          |      |     |     |     |    |   |
|-----------------|-----------------|-----|-----|------------|--------------------------|------|-----|-----|-----|----|---|
| 41              | OA              | III | No  | clinically | continuation of CTx      | 3    | Yes | 3.5 | 2.1 | 40 | 1 |
|                 |                 |     | Yes | clinically | BEV/IRI, died 2 mo later | 2    | Yes | 4.9 | 2.6 | 40 | 1 |
| 42 <sup>+</sup> | Medulloblastoma | IV  | No  | clinically | continuation of CTx      | 2    | Yes | 2.8 | 2.1 | 5  | 3 |
| 45              | ODG             | II  | Yes | clinically | symptomatic treatment    | 12   | No  | 1.8 | 1.7 | 23 | 2 |
|                 |                 |     | Yes | R          | R                        | n.a. | No  | 1.8 | 1.7 | 30 | 1 |

**A:** astrocytoma; **AA\*:** secondary anaplastic astrocytoma after malignant progression; **PXA:** pleomorphic xanthoastrocytoma; **GBM:** glioblastoma; **MM:** malignant melanoma; **OA:** oligoastrocytoma; **ODG:** oligodendroglioma; **PD:** progressive disease/tumor recurrence; **CE:** contrast enhancement; **RTx:** radiation therapy; **CTx:** Chemotherapy; **BEV/IRI:** bevacizumab in combination with irinotecan; **TMZ:** temozolomide 5/28; **B:** biopsy; **R:** resection; **TTP:** time-to-peak; **n.a.:** not available / patient lost of follow-up; <sup>+</sup>patients were additionally examined for other indications

**Supplemental Table 3:** Use of <sup>18</sup>F-FET PET for monitoring of chemotherapy effects

| Patient ID      | Diagnosis       | WHO Grade | Treatment               | Timing of <sup>18</sup> F-FET PET | CE on MRI | TBR <sub>max</sub> | TBR <sub>mean</sub> | TTP (min) | Kinetic pattern | <sup>18</sup> F-FET PET treatment effects compared to baseline |                                 |                             |
|-----------------|-----------------|-----------|-------------------------|-----------------------------------|-----------|--------------------|---------------------|-----------|-----------------|----------------------------------------------------------------|---------------------------------|-----------------------------|
|                 |                 |           |                         |                                   |           |                    |                     |           |                 | Decrease of TBR <sub>max</sub>                                 | Decrease of TBR <sub>mean</sub> | Change of kinetic parameter |
| 16 <sup>+</sup> | GBM             | IV        | TMZ                     | baseline                          | Yes       | 2.4                | 1.9                 | 40        | 1               |                                                                |                                 |                             |
|                 |                 |           |                         | after 3 <sup>rd</sup> cycle       | n.a.      | 2.5                | 1.9                 | 17        | 3               | +4%                                                            | 0%                              | yes                         |
|                 |                 |           |                         | after 6 <sup>th</sup> cycle       | n.a.      | 1.9                | 1.7                 | 30        | 2               | 21%                                                            | 10%                             | yes                         |
| 19 <sup>+</sup> | GBM             | IV        | TMZ                     | baseline*                         | Yes       | 3.0                | 2.0                 | 25        | 2               |                                                                |                                 |                             |
|                 |                 |           |                         | after 12 <sup>th</sup> cycle      | Yes       | 2.0                | 1.7                 | 40        | 1               | 33%                                                            | 15%                             | yes                         |
| 36 <sup>+</sup> | Ewing's sarcoma | IV        | Carboplatin + Topotecan | baseline                          | Yes       | 3.1                | 2.3                 | 13        | 3               |                                                                |                                 |                             |
|                 |                 |           |                         | 4 mo after baseline               | Yes       | 1.9                | 1.8                 | 30        | 1               | 39%                                                            | 22%                             | yes                         |
|                 |                 |           |                         | 8 mo after baseline               | Yes       | 2.1                | 1.8                 | 40        | 1               | 32%                                                            | 22%                             | yes                         |
| 42 <sup>+</sup> | Medulloblastoma | IV        | Carboplatin + Etoposid  | baseline**                        | Yes       | 2.8                | 2.1                 | 5         | 3               |                                                                |                                 |                             |
|                 |                 |           |                         | 2 mo after baseline               | Yes       | 1.7                | 1.6                 | 40        | 1               | 39%                                                            | 24%                             | yes                         |

**GBM:** glioblastoma; **CE:** contrast enhancement; **RTx:** radiation therapy; **CTx:** Chemotherapy; **BEV:** bevacizumab; **TMZ:** Temozolomide 5/28; **TTP:** time-to-peak; \*baseline PET was performed at initial diagnosis (s. Table 1); \*\*baseline PET was performed at recurrence (s. Table 2); <sup>+</sup>patients were additionally examined for other indications

**Supplemental Table 4:** Use of  $^{18}\text{F}$ -FET PET for the detection of residual tumor tissue after resection

| Patient ID      | Diagnosis       | WHO Grade | Time between tumor resection and $^{18}\text{F}$ -FET PET (d) | CE on early postoperative MRI | Extent of resection | TBR <sub>max</sub> | TBR <sub>mean</sub> | TTP (min) | Kinetic pattern | Residual tumor on $^{18}\text{F}$ -FET PET |
|-----------------|-----------------|-----------|---------------------------------------------------------------|-------------------------------|---------------------|--------------------|---------------------|-----------|-----------------|--------------------------------------------|
| 16 <sup>+</sup> | GBM             | IV        | 8                                                             | n.a.                          | n.a.                | 3.9                | 2.4                 | 25        | 2               | Yes                                        |
| 28 <sup>+</sup> | GBM             | IV        | 14                                                            | Yes                           | PR                  | 3.2                | 2.1                 | n.a.      | n.a.            | Yes                                        |
| 29              | Ependymoma      | II        | 7                                                             | Yes                           | PR                  | 3.3                | 2.2                 | 10        | 3               | Yes                                        |
|                 |                 |           | 36                                                            | Yes                           | PR                  | 2.6                | 2.0                 | 33        | 1               | Yes                                        |
| 31              | A               | I         | 2                                                             | Yes                           | PR                  | 3.5                | 2.5                 | 40        | 1               | Yes                                        |
| 33 <sup>+</sup> | PXA             | II        | 7                                                             | Yes                           | PR                  | 2.1                | 1.8                 | 40        | 1               | Yes                                        |
| 35              | Medulloblastoma | IV        | 7                                                             | No                            | CR                  | 1.7                | 1.6                 | 33        | 1               | No                                         |
| 36 <sup>+</sup> | Ewing's sarcoma | IV        | 7                                                             | Yes                           | PR                  | 3.6                | 2.5                 | 20        | 2               | Yes                                        |
| 37              | OA              | III       | 14                                                            | Yes                           | PR                  | 2.4                | 2.0                 | 20        | 2               | Yes                                        |
| 39              | GBM             | IV        | 7                                                             | No                            | PR*                 | 2.9                | 2.1                 | n.a.      | n.a.            | Yes                                        |
| 46              | GBM             | IV        | 20                                                            | Yes                           | PR                  | 2.1                | 1.8                 | n.a.      | n.a.            | Yes                                        |

**A:** astrocytoma; **AA:** anaplastic astrocytoma; **PXA:** pleomorphic xanthoastrocytoma; **GBM:** glioblastoma; **OA:** oligoastrocytoma; **CE:** contrast enhancement on early postoperative MRI within the first 48 h after resection; **CR:** complete resection; **PR:** partial resection; **TTP:** time-to-peak; **n.a.:** not available; <sup>+</sup>patients were additionally examined for other indications; \*presence of non-enhancing residual tumor

**Supplemental Table 5:** Results of the diagnostic performance of PET parameter

| <b>Identification of neoplastic tissue in newly diagnosed brain lesions</b> | <b>TBR<sub>max</sub></b> | <b>TBR<sub>mean</sub></b> | <b><sup>18</sup>F-FET kinetic pattern</b> | <b>Combination of TBR<sub>max</sub> and <sup>18</sup>F-FET kinetic pattern</b> |
|-----------------------------------------------------------------------------|--------------------------|---------------------------|-------------------------------------------|--------------------------------------------------------------------------------|
| <i>Threshold</i>                                                            | 1.7                      | 1.4                       | ≥ 2                                       | *                                                                              |
| <i>Sensitivity</i>                                                          | 79%                      | 74%                       | 67%                                       | 95%                                                                            |
| <i>Specificity</i>                                                          | 72%                      | 71%                       | 67%                                       | 50%                                                                            |
| <i>Accuracy</i>                                                             | 77%                      | 73%                       | 67%                                       | 88%                                                                            |
| <i>PPV</i>                                                                  | 88%                      | 88%                       | 86%                                       | 90%                                                                            |
| <i>NPV</i>                                                                  | 56%                      | 50%                       | 40%                                       | 67%                                                                            |
| <i>AUC ± standard error</i>                                                 | 0.80 ± 0.09              | 0.79 ± 0.09               | -                                         | -                                                                              |
| <i>P-value</i>                                                              | 0.021                    | 0.026                     | 0.192** (n.s.)                            | 0.061** (n.s.)                                                                 |
| <hr/>                                                                       |                          |                           |                                           |                                                                                |
| <b>Identification of tumor progression/recurrence</b>                       | <b>TBR<sub>max</sub></b> | <b>TBR<sub>mean</sub></b> | <b><sup>18</sup>F-FET kinetic pattern</b> | <b>Combination of TBR<sub>max</sub> and <sup>18</sup>F-FET kinetic pattern</b> |
| <i>Threshold</i>                                                            | 1.7                      | 1.6                       | ≥ 2                                       | *                                                                              |
| <i>Sensitivity</i>                                                          | 92%                      | 92%                       | 75%                                       | 92%                                                                            |
| <i>Specificity</i>                                                          | 64%                      | 64%                       | 90%                                       | 60%                                                                            |
| <i>Accuracy</i>                                                             | 79%                      | 79%                       | 82%                                       | 77%                                                                            |
| <i>PPV</i>                                                                  | 75%                      | 75%                       | 90%                                       | 73%                                                                            |
| <i>NPV</i>                                                                  | 88%                      | 88%                       | 75%                                       | 86%                                                                            |
| <i>AUC ± standard error</i>                                                 | 0.78 ± 0.10              | 0.77 ± 0.10               | -                                         | -                                                                              |
| <i>P-value</i>                                                              | 0.020                    | 0.024                     | 0.004**                                   | 0.020**                                                                        |

\* presence of TBR<sub>max</sub> of ≥ 1.7 or kinetic pattern 2 or 3

\*\* Fisher exact test

AUC = area under the curve

PPV = positive predictive value

NPV = negative predictive value

n.s. = not significant
